# Supplementary material for: Virtual Screening of Different Subclasses of Lignans with Anticancer Potential and Based on Genetic Profile
Source: MDPI journal article supplement (doi:10.3390/molecules28166011), 2023-08-11
Supplement: s1 [file s1]

# Virtual screening of different subclasses of lignans with anticancer potential and based on genetic profile

Mayara dos Santos Maia<sup>1</sup>, Francisco Jaime Bezerra Mendonça-Junior<sup>2,5\*</sup>, Gabriela Cristina Soares Rodrigues<sup>3</sup>, Adriano Soares da Silva<sup>4</sup>, Niara Isis Pereira de Oliveira<sup>4</sup>, Pablo Rayff da Silva<sup>5</sup>, Cícero Francisco Bezerra Felipe<sup>5</sup>, Ana Pavla Almeida Diniz Gurgel<sup>6</sup>, Anuraj

<sup>1</sup> Department of Molecular Biology, Federal University of Paraíba, João Pessoa-PB, Brazil; mayarasm@ltf.ufpb.br.

<sup>2</sup> Laboratory of Synthesis and Drug Delivery, State University of Paraíba, João Pessoa-PB, Brazil; franciscojaime@servidor.uepb.edu.br

<sup>3</sup> Miriri Foods and Bioenergy S/A; gaby.ecologia@gmail.com.

<sup>4</sup> Program in Ecology and Environmental Monitoring, Federal University of Paraíba, João Pessoa-PB, Brazil; Adriano.soares05071997@gmail.com; naira.isis.ni@gmail.com.

<sup>5</sup> Postgraduate Program in Natural Synthetic and Bioactive Products, Federal University of Paraíba, João Pessoa-PB, Brazil; pablo-rayff@hotmail.com; cicero@dbm.ufpb.br.

<sup>6</sup> Program in Cellular and Molecular Biology, Federal University of Paraíba, João Pessoa-PB, Brazil; ana.pavla@academico.ufpb.br.

<sup>7</sup> In Silico Research Laboratory, Eminent Bioscience, Indore, Madhya Pradesh, India; anuraj@eminentbio.com

<sup>8</sup> Laboratory of Cheminformatics, Program of Natural and Synthetic Bioactive Products (PgPNSB), Health Sciences Center, Federal University of Paraíba, João Pessoa-PB, Brazil; luciana.scotti@gmail.com; mtscotti@gmail.com.

\* Correspondence: franciscojaime@servidor.uepb.edu.br

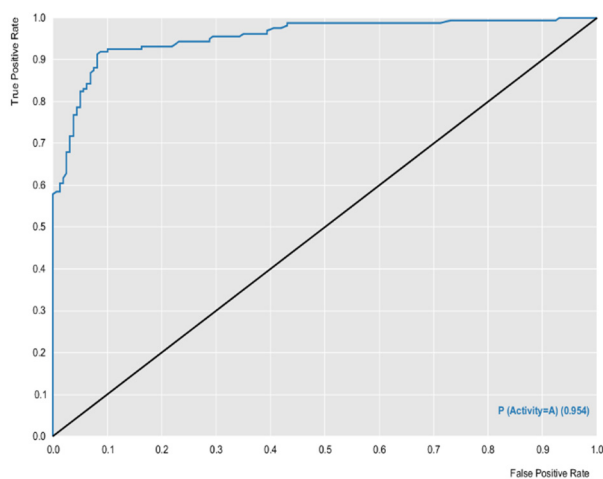

(a)

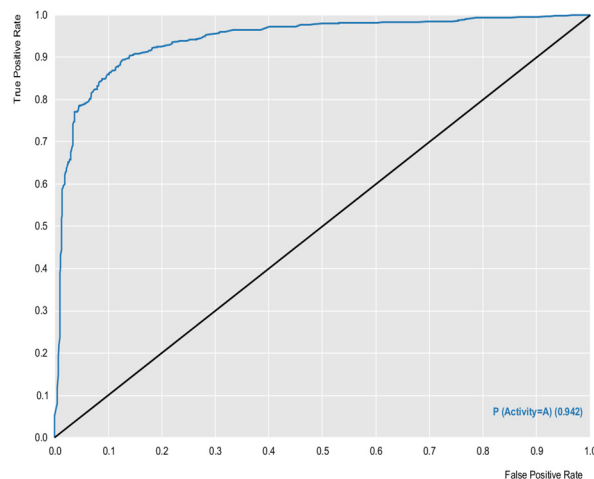

(b)

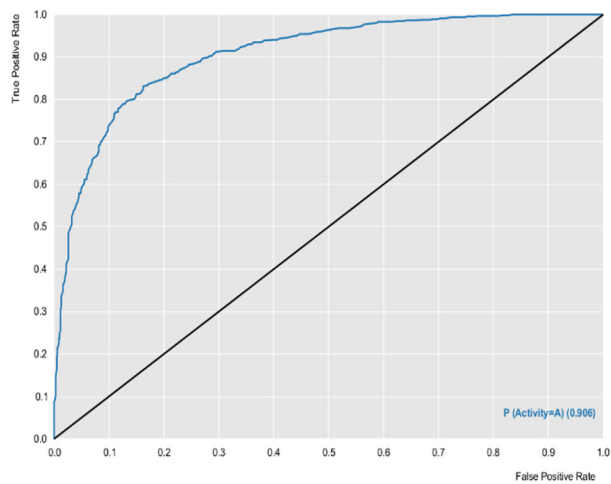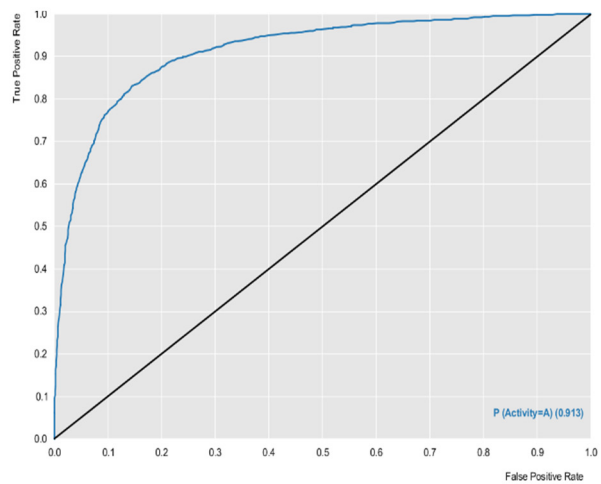

(c)

(d)

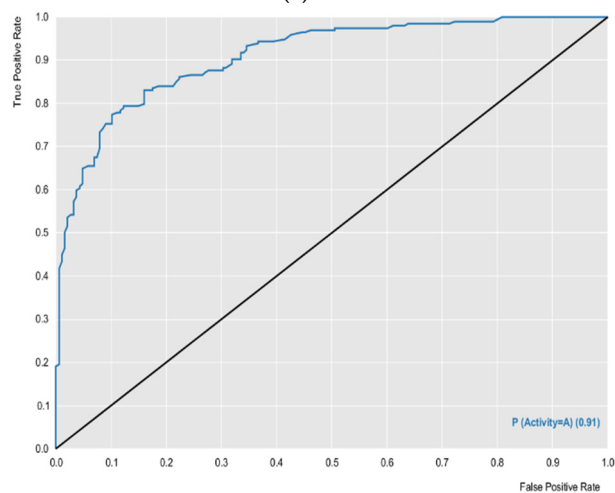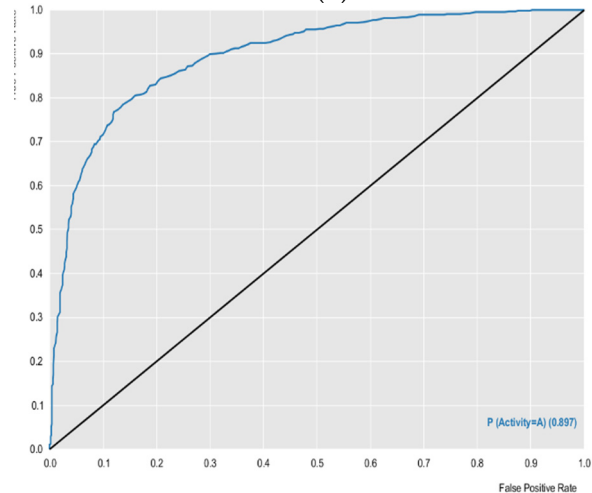

(e)

(f)

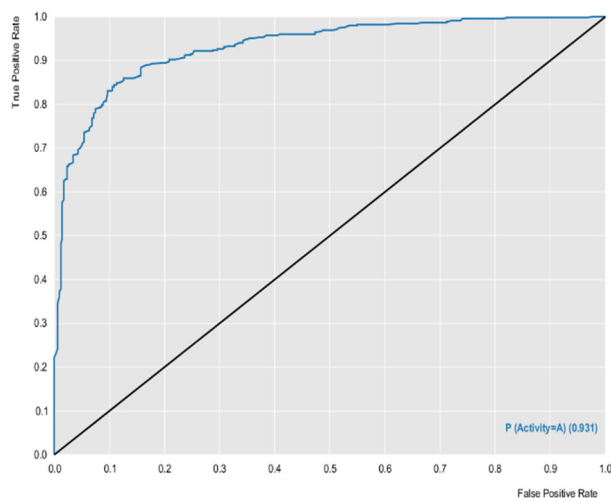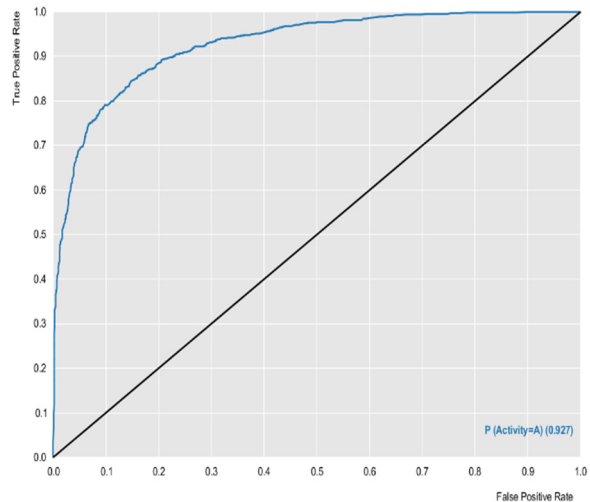

(g)

(h)

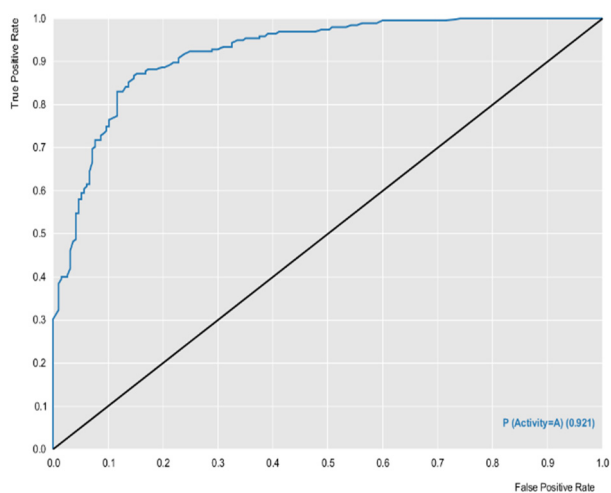

(i)

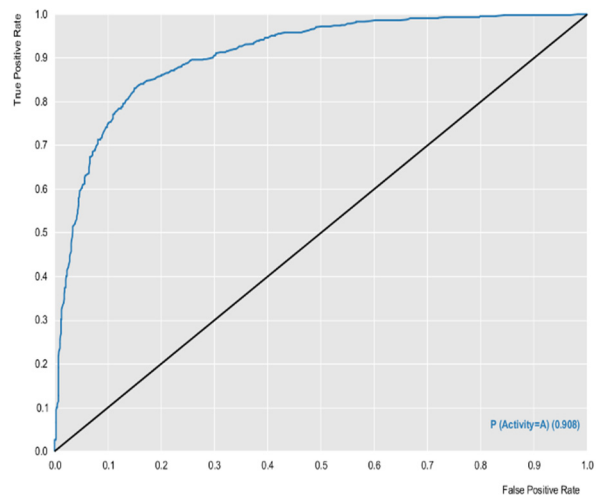

(j)

**Figure 1.** ROC (Receiver Operating Characteristic) curve generated for the five selected protein models. (a) ABL test; (b) ABL cross; (c) EFGR test; (d) EFGR cross; (e) HDAC test; (f) HDAC cross; (g) mTOR test; (h) mTOR cross; (i) PARP test; and (j) PARP cross.
